# Supplementary material for: The impact of freeze-drying infant fecal samples on measures of their bacterial community profiles and milk-derived oligosaccharide content
Source: PubMed Central journal article supplement (PMC4727960; doi:10.7717/peerj.1612), 2016-01-21
Supplement: peerj-04-1612-s001.pdf [file peerj-04-1612-s001.pdf]

Supplementary Table 1

| Infant (Subject) number | UC Davis Lactation Study ID | Day of Life | Received Breast Milk | Wet feces mass (split between two duplicates) (mg) | Sample mass before freeze drying (g) | Sample mass after freeze-drying (g) | Percent of original weight | Freeze-dried mass (split between two duplicates) (mg) |
|-------------------------|-----------------------------|-------------|----------------------|----------------------------------------------------|--------------------------------------|-------------------------------------|----------------------------|-------------------------------------------------------|
| 1                       | 1038                        | 345         | Unknown              | 320                                                | 1.7                                  | 0.498                               | 29.29412                   | 87.88235                                              |
| 2                       | 1037                        | 345         | No                   | 259                                                | 1.68                                 | 0.245                               | 14.58333                   | 43.75                                                 |
| 3                       | 1041                        | 345         | Yes                  | 278.3                                              | 1.3                                  | 0.336                               | 25.84615                   | 77.53846                                              |
| 4                       | 1036                        | 345         | Unknown              | 297.4                                              | 1.74                                 | 0.398                               | 22.87356                   | 68.62069                                              |
| 5                       | 1034                        | 349         | No                   | 359.8                                              | 1.7                                  | 0.51                                | 30                         | 90                                                    |
| 6                       | 1039                        | 345         | No                   | 338                                                | 1.6                                  | 0.387                               | 24.1875                    | 72.5625                                               |
| 7                       | 1007                        | 345         | No                   | 357.9                                              | 1.77                                 | 0.544                               | 30.73446                   | 92.20339                                              |
| 8                       | 1005                        | 345         | Yes                  | 350.8                                              | 1.73                                 | 0.562                               | 32.48555                   | 97.45665                                              |
| 9                       | 1002                        | 345         | Unknown              | 335.5                                              | 1.73                                 | 0.46                                | 26.5896                    | 79.76879                                              |
| 10                      | 1004                        | 344         | Yes                  | 311.8                                              | 1.73                                 | 0.341                               | 19.71098                   | 59.13295                                              |
| 11                      | 1003                        | 345         | Yes                  | 200.8                                              | 1.54                                 | 0.279                               | 18.11688                   | 54.35065                                              |
| 12                      | 1001                        | 346         | No                   | 367                                                | 1.71                                 | 0.445                               | 26.02339                   | 78.07018                                              |
| 13                      | 1028                        | 345         | No                   | 313                                                | 1.7                                  | 0.475                               | 27.94118                   | 83.82353                                              |
| 14                      | 1019                        | 345         | Yes                  | 340                                                | 1.71                                 | 0.315                               | 18.42105                   | 55.26316                                              |
| 15                      | 1014                        | 345         | Yes                  | 307.8                                              | 1.8                                  | 0.337                               | 18.72222                   | 56.16667                                              |
| 16                      | 1012                        | 345         | Yes                  | 140.8                                              | 0.92                                 | 0.254                               | 27.6087                    | 82.82609                                              |
| 17                      | 1011                        | 345         | Yes                  | 320.8                                              | 1.8                                  | 0.509                               | 28.27778                   | 84.83333                                              |
| 18                      | 1010                        | 393         | Yes                  | 348                                                | 1.77                                 | 0.44                                | 24.85876                   | 74.57627                                              |
| 19                      | 1040                        | 351         | No                   | 320                                                | 1.75                                 | 0.383                               | 21.88571                   | 65.65714                                              |
| 20                      | 1032                        | 346         | Yes                  | 102.8                                              | 1.62                                 | 0.268                               | 16.54321                   | 49.62963                                              |
| 21                      | 1031                        | 346         | Yes                  | 277.3                                              | 1.7                                  | 0.497                               | 29.23529                   | 87.70588                                              |
| 22                      | 1015                        | 345         | Yes                  | 298.2                                              | 1.71                                 | 0.317                               | 18.53801                   | 55.61404                                              |
| 23                      | 1023                        | 345         | Yes                  | 286                                                | 1.74                                 | 0.49                                | 28.16092                   | 84.48276                                              |
| 24                      | 1029                        | 345         | Yes                  | 333                                                | 1.85                                 | 0.425                               | 22.97297                   | 68.91892                                              |
| Average                 |                             |             |                      |                                                    |                                      |                                     | 24.31714                   | 72.95142                                              |
